# Supplementary material for: Identification and characterization of the role of c-terminal Src kinase in dengue virus replication
Source: PubMed Central journal article supplement (PMC4960526; doi:10.1038/srep30490), 2016-07-26

1 **Identification and characterization of the role of c-terminal Src kinase in dengue**

2 **virus replication**

3 Rinki Kumar, Tanvi Agrawal, Naseem Ahmed Khan, Yuji Nakayama and Guruprasad

4 R. Medigeshi

5

1 **SUPPLEMENTARY FIGURE LEGENDS**

2

3 **Fig. S1. Identification of TKs that inhibit or enhance DENV infection using**  
4 **siRNA screening.** (A and B) Huh-7 cells were transfected with 10 nM each of  
5 smartpool siRNAs targeting the 88 human TKs and 48 h post-transfection, cells were  
6 infected with 1 MOI of DENV-2. Viral titers in the infected culture supernatants were  
7 measured at 24 h pi by plaque assay. Red line indicates 50% titer values relative to  
8 non-targeting control (C) siRNA and green line indicates a two-fold increase  
9 threshold in viral titers relative to control siRNA. Data are from two experiments  
10 performed with two or three replicates and indicate mean with SEM. Arrows indicate  
11 the five inhibitory tyrosine kinases shown in figure 1.

12

13 **Fig. S2. Csk knock-down inhibits DENV replication in BHK-21 cells.** (A) BHK-  
14 21 cells were transfected with 10 nM of siRNAs targeting *CSK* or non-targeting  
15 control (NTC) and 48 h post-transfection, cells were infected with 1 MOI of DENV-2.  
16 Viral titers in the infected culture supernatants were measured at 24 h pi by plaque  
17 assay. The data are representative of two experiments performed with three replicates  
18 and indicate mean with SEM. P value was calculated by unpaired t test.  
19 \*\*\*\*p<0.0001.

20

21 **Fig. S3. Csk knock-down does not block DENV internalization.** Huh-7 cells were  
22 transfected with 10 nM of either of the two siRNAs targeting *CSK* and 48 h post-  
23 transfection, cells were infected with 5 MOI of DENV-2. Total RNA was isolated 1 h  
24 post-infection and the amount of DENV genome inside the cells were measured by  
25 real-time PCR. Fold change was calculated by normalizing DENV Ct values with  $\beta$ -

1 actin transcript levels. The data are representative of two experiments performed with  
2 three replicates and indicate mean with SEM.

3

4 **Fig. S4. The kinase domain and SH3 domain of Csk is important for DENV**

5 **infection.** (A) Huh-7 cells were transfected with the plasmids for overexpression of

6 the indicated proteins tagged with a FLAG epitope for detection. 24 h post-

7 transfection, cells were infected with 5 MOI of DENV-2. Cells were fixed at 24 h pi

8 and stained using primary antibodies against DENV-Envelope and FLAG epitope

9 followed by secondary antibodies conjugated with Alexa-488 (green) and Alexa-568

10 (Red) respectively. Nuclei were stained with DAPI. UT- Untransfected. Scale – 100

11  $\mu\text{m}$ .

12

Figure S1

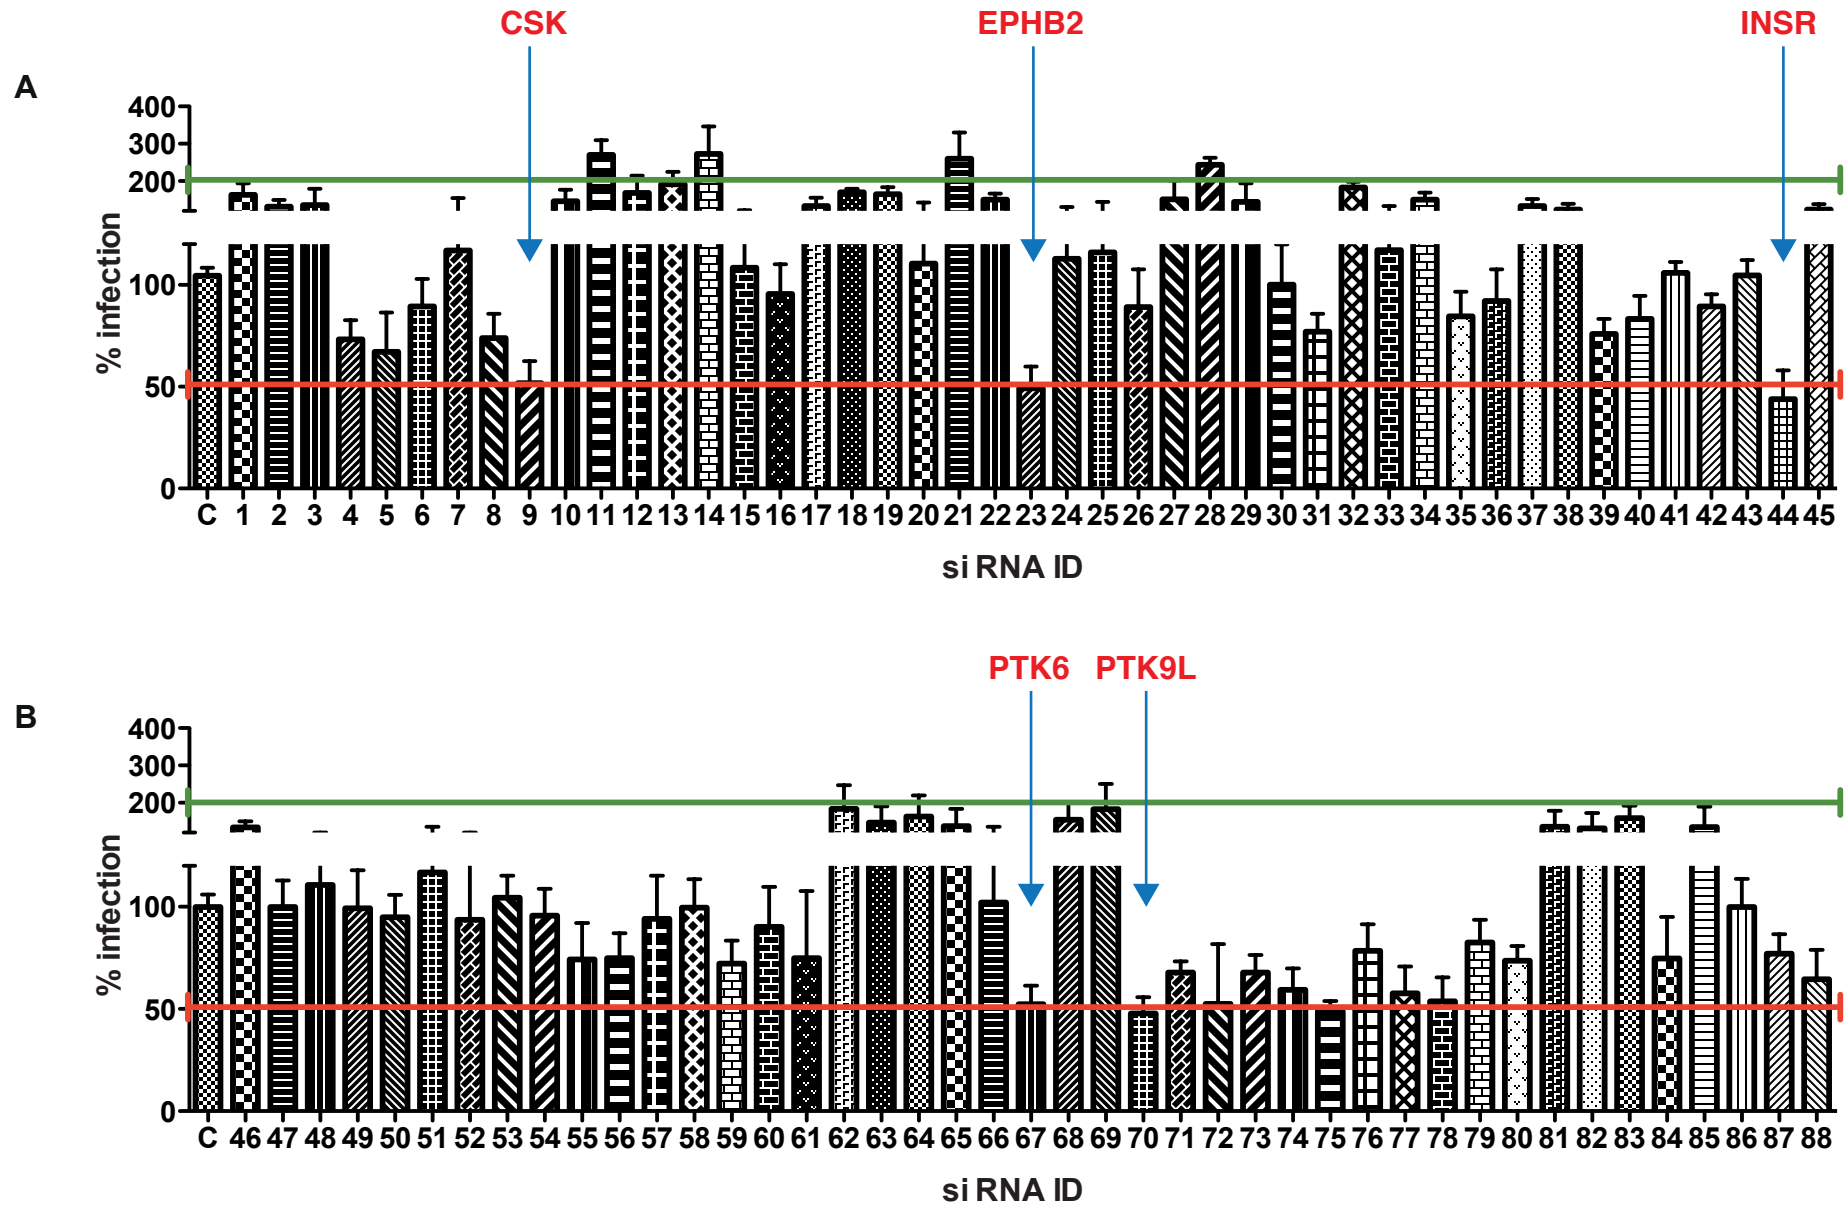

Figure S2

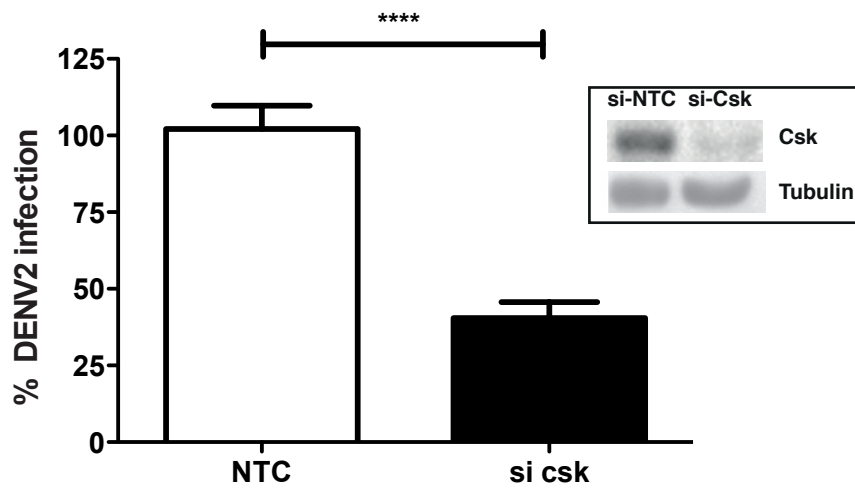

Figure S3

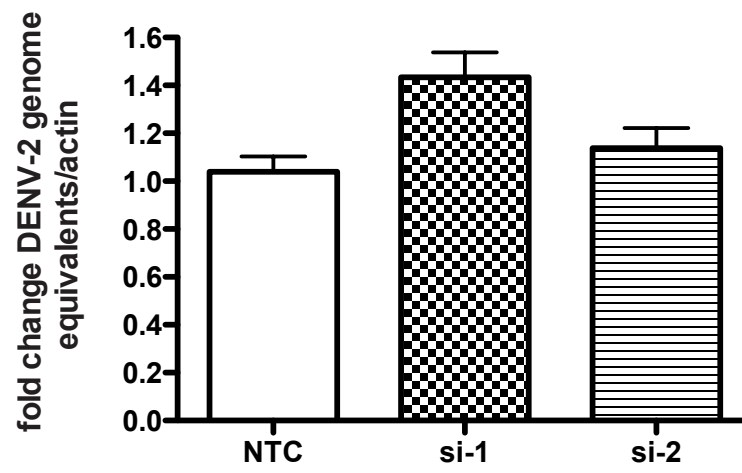

**Figure S4**

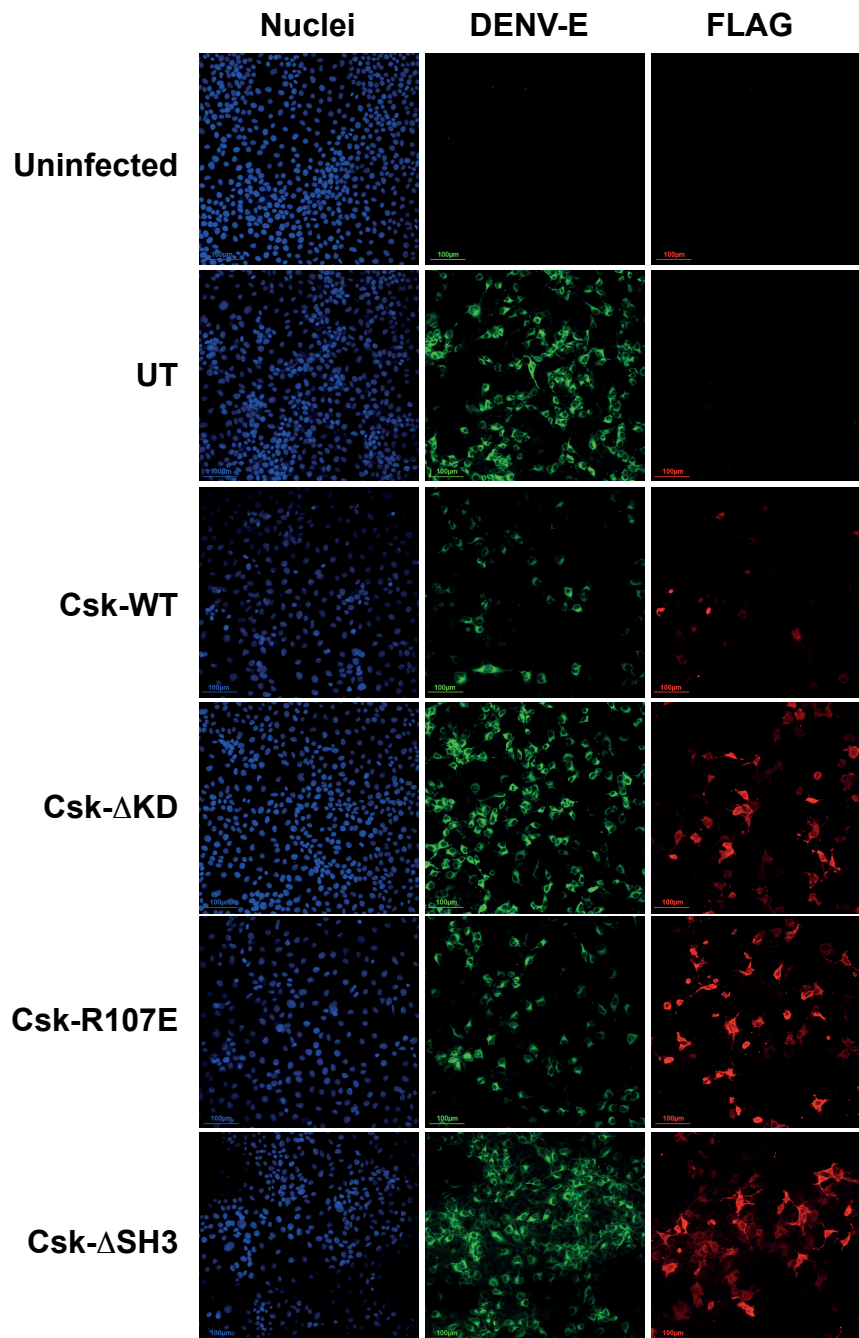

Supplement: srep30490-s1.pdf [file srep30490-s1.pdf]
